1 **Preoperative COVID-19 Vaccination is Associated with Decreased Perioperative Mortality**  
2 **after Major Vascular Surgery**

3 Molly Ratner MD<sup>1\*</sup>, Karan Garg MD<sup>1\*</sup>, Heepeel Chang MD<sup>2</sup>, Anjali Nigalaye MD<sup>3</sup>, Steven  
4 Medvedosky BS<sup>1</sup>, Glenn Jacobowitz MD<sup>1</sup>, Jeffrey J Siracuse MD<sup>4</sup>, Virendra Patel MD<sup>5</sup>, Marc  
5 Schermerhorn MD<sup>6</sup>, Charles DiMaggio PhD<sup>1</sup>, Caron B Rockman MD<sup>1</sup>

6  
7 <sup>1</sup>Division of Vascular and Endovascular Surgery, Department of Surgery, New York University  
8 Langone Medical Center, New York, NY.

9 <sup>2</sup>Division of Vascular Surgery, Department of Surgery, Westchester Medical Center, Valhalla,  
10 NY.

11 <sup>3</sup> Division of Hospitalist Medicine, Department of Medicine, Mount Sinai Beth Israel Hospital,  
12 New York, NY.

13 <sup>4</sup>Division of Vascular and Endovascular Surgery, Department of Surgery, Boston Medical  
14 Center, Boston, Massachusetts

15 <sup>5</sup>Division of Vascular and Endovascular Interventions, Department of Surgery, New York  
16 Presbyterian- Columbia University Irving Medical Center, New York, NY

17 <sup>6</sup>Division of Vascular and Endovascular Surgery, Department of Surgery, Beth Israel Deaconess  
18 Medical Center, Boston, Massachusetts

19

20 \*Drs Molly Ratner and Karan Garg contributed equally to this manuscript.

21

22

23

24 **Pre-publication Corresponding Author**

25 Molly Ratner, MD

26 Division of Vascular and Endovascular Surgery

27 Department of Surgery

28 New York University Langone Medical Center, NYU Grossman School of Medicine

29 550 First Avenue, New York, NY 10016, USA

30 Phone: 212-263-7311

31 [Molly.ratner@nyulangone.org](mailto:Molly.ratner@nyulangone.org)

32

33 **Word Count:** 4952

34

35

36

37

38

39

40

41

42

43

44

45

46

47 **Abstract**

48 **Background:** The objective of this study was to examine the effect of COVID-19 vaccination  
49 on perioperative outcomes after major vascular surgery.

50

51 **Methods:** This is a multicenter retrospective study of patients who underwent major vascular  
52 surgery between December 2021 through August 2023. The primary outcome was all-cause  
53 mortality within 30 days of index operation or prior to hospital discharge. Multivariable models  
54 were used to examine the association between vaccination status and the primary outcome.

55

56 **Results:**

57 Of the total 85,424 patients included, 19161 (22.4%) were unvaccinated. Unvaccinated patients  
58 were younger compared to vaccinated patients (mean age 68.44 +/- 10.37 years vs 72.11 +/- 9.20  
59 years,  $p < .001$ ) and less likely to have comorbid conditions, including hypertension (87.2% vs  
60 89.7%,  $p < .001$ ), congestive heart failure (14.5% vs 15.9%,  $p < .001$ ), chronic obstructive  
61 pulmonary disease (35.7% vs 36.3,  $p < .001$ ) and renal failure requiring hemodialysis (1.4% vs  
62 1.7%,  $p = .005$ ). After risk factor adjustment, vaccination was associated with decreased  
63 mortality (OR 0.7, 95% CI 0.62 - 0.81,  $p < .0001$ ). Stratification by procedure type demonstrated  
64 that vaccinated patients had decreased odds of mortality after open AAA (OR 0.6, 95% CI 0.42-  
65 0.97,  $p = 0.03$ ), EVAR (OR 0.6, 95% CI 0.43-0.83,  $p = 0.002$ ), CAS (OR 0.7, 95% CI 0.51-0.88,  $p$   
66  $= 0.004$ ) and infra-inguinal lower extremity interventions (OR 0.7, 95% CI 0.48-0.96,  $p = 0.03$ ).

67

68 **Conclusions:**

69 COVID-19 vaccination is associated with reduced perioperative mortality in patients undergoing  
70 vascular surgery. This association is most pronounced for patients undergoing aortic aneurysm  
71 repair, carotid stenting and infrainguinal bypass.

72

73

74

75

76

77

78

79

80

81

82

83

84

85

86

87

88

89

90

91

92 **Introduction**

93 Although primarily an infection of the respiratory tract, Coronavirus Disease 2019 (COVID-19)  
94 generates a systemic inflammatory state leading to dysregulation of and injury to multiple organ  
95 systems,<sup>1-5</sup> including the vasculature.<sup>6,7</sup> In the perioperative period, it has been proposed that the  
96 exaggerated immune response elicited by both surgical trauma and severe acute respiratory  
97 syndrome coronavirus 2 (SARS-CoV-2) may be responsible for the increased risk of  
98 perioperative mortality and morbidity in patients with active or recent infections.<sup>8,9</sup> These  
99 findings have prompted groups like the American Society of Anesthesiologists to recommend  
100 delaying elective surgery in patients with COVID-19.<sup>10</sup> However, as the pandemic enters a new  
101 phase with widespread population immunity in the setting of vaccine development and/or prior  
102 infection, risk stratification will need to reflect these changes.

103  
104 COVID-19 vaccination has been associated with improved outcomes, including decreased  
105 mortality, in patients undergoing various surgical procedures, such as cardiovascular,  
106 gastrointestinal operations and orthopedic surgeries.<sup>11-13</sup> However, there is a paucity of literature  
107 evaluating the effect of COVID-19 vaccination on perioperative outcomes after major vascular  
108 surgery, specifically. In this retrospective cohort study, we utilized the Society for Vascular  
109 Surgery Vascular Quality Initiative (SVS-VQI) database to examine national trends in  
110 perioperative mortality after major vascular surgery in the post-vaccination stage of the  
111 pandemic.

112

113 **Methods**

114 *Data Source*

115 This study utilized the SVS-VQI, a prospectively maintained set of 14 registries containing  
116 standardized data collected from over 1000 institutions across the United States, Canada and  
117 Singapore. The VQI stores demographic, perioperative and postoperative data on major vascular  
118 procedures for the purpose of improving surgical outcomes. Approval was obtained from the  
119 SVS VQI Patient Safety Organization prior to analysis. The study was exempt from Institutional  
120 Board Review approval and individual patient consent was waived given its retrospective  
121 nature.

122

### 123 *Study Population and Definitions*

124 The SVS-VQI was queried from the start of COVID vaccination data collection on December  
125 16<sup>th</sup>, 2021, through its termination on August 31, 2023. Patients were included if they underwent  
126 a “major” vascular surgery procedure (i.e. those performed mainly in a non-ambulatory setting),  
127 including aortic aneurysm repair (open vs endovascular abdominal/thoracic), carotid artery  
128 endarterectomy or stenting and open peripheral revascularization. Endovascular peripheral  
129 vascular interventions (PVI) were excluded given the shift towards performing these procedures  
130 in an outpatient or ambulatory care setting.<sup>14</sup>

131

132 The primary variable of interest was COVID vaccination status. Vaccinated patients included  
133 those who had completed the full vaccine series by the time of surgery or had received at least  
134 one vaccine with the intention of completing the series. Baseline characteristics, such as  
135 demographic and medical history, were collected and included: age, sex, race, smoking status,  
136 hypertension, hyperlipidemia, diabetes, coronary artery disease (CAD), congestive heart failure  
137 (CHF), chronic obstructive pulmonary disease (COPD), cerebrovascular disease (CVD), renal

138 failure requiring hemodialysis (HD) and preoperative medication utilization. The urgency of the  
139 case (i.e. elective vs urgent/emergent) was additionally considered a potential confounder.

140

141 *Outcomes:*

142 The primary outcome was perioperative all-cause mortality, defined as occurring either prior to  
143 discharge from the hospital or within 30 days of index operation. The secondary endpoints were  
144 surgery-specific perioperative mortality.

145

146 *Statistical Analysis*

147 All analyses were conducted in the R statistical software program. Comparisons of continuous  
148 variables were based on t-tests and categorical variables were compared using Chi Square tests  
149 as part of the `CratTableOne` function of the R `tableone` package. Unadjusted odds ratios (ORs)  
150 for the association of COVID vaccination with perioperative mortality were calculated using the  
151 `epitab` function of the R `epitools` package. Separate multivariable logistic regression models for  
152 each type of procedure (open repair, EVAR, TEVAR, carotid endarterectomy, carotid artery  
153 stenting, infrainguinal and suprainguinal revascularization) comparing the association of COVID  
154 vaccination with perioperative mortality were adjusted for confounding by age, gender,  
155 hypertension, diabetes, race, ethnicity, pre-operative history of smoking and whether the  
156 procedure was elective or urgent. A single model with an additional control variable for the type  
157 of procedure was run for the full combined data. An additional multilevel model which set the  
158 intercept to vary by procedure type was created to establish a baseline risk for mortality risk for  
159 each procedure cohort. Results of the multivariable and multilevel models are presented as ORs  
160 with associated p-values and 95% confidence intervals (CIs).

161 **Results**

162 *Baseline Characteristics*

163 Of the total 85,424 patients identified, 19161 (22.4%) were unvaccinated at the time of index  
164 operation. Unvaccinated patients were significantly younger compared to vaccinated patients  
165 (mean age 68.44 +/- 10.37 years vs 72.11 +/- 9.20 years,  $p < 0.001$ ). The majority of patients in  
166 both cohorts were male (65.0% vs 65.6%,  $p = 0.34$ ) and white, although black patients were  
167 over-represented in the unvaccinated group (8.3% vs 7.6%,  $p = 0.001$ ). Unvaccinated patients  
168 were more likely to be current smokers (39.4% vs 25.5%,  $p < 0.001$ ) compared to vaccinated  
169 patients. Unvaccinated patients were less likely to have a history of hypertension (87.2% vs  
170 89.7%,  $p < 0.001$ ), CHF (14.5% vs 15.9%,  $p < 0.001$ ), COPD (35.7% vs 36.3,  $p < 0.001$ ) and HD  
171 dependence (1.4% vs 1.7%,  $p = 0.005$ ). Unvaccinated patients were additionally less likely to be  
172 taking medications for cardiovascular risk reduction, including aspirin (75.2% vs 77.9%,  $p$   
173  $< 0.001$ ), statins (77.9% vs 84.7%,  $p < 0.001$ ) and beta-blockers (44.9% vs 50.4%,  $p < 0.001$ ).  
174 Unvaccinated patients were more likely to have a positive pre- or postoperative positive COVID  
175 test, although the overall incidence was low (1.9% vs 1.1%,  $p < 0.001$ ). Unvaccinated patients  
176 also less frequently underwent elective procedures (76.2% vs 83.5%,  $p < 0.001$ ). See Table I for a  
177 full list of baseline characteristics.

178

179 *Multivariable Model*

180 After adjusting for age, gender, race, ethnicity, smoking status, hypertension, diabetes, coronary  
181 artery disease and dialysis, vaccinated status was associated with decreased mortality (OR 0.7,  
182 95% CI 0.62 - 0.81,  $p < 0.001$ ). A multilevel model with the same variables in the multivariable  
183 logistic model with a random intercept by procedure type returned the same estimate for the



184 effect of the vaccine (OR 0.7, 95% CI 0.62 -0.81). After stratifying by procedure type,  
185 vaccinated patients had decreased odds of mortality after open AAA (OR 0.6, 95% CI 0.42-0.97,  
186  $p = 0.03$ ), EVAR (OR 0.6, 95% CI 0.43-0.83,  $p = 0.002$ ), CAS (OR 0.7, 95% CI 0.51-0.88,  $p =$   
187  $0.004$ ) and infra-inguinal lower extremity interventions (OR 0.7, 95% CI 0.48-0.96,  $p = 0.03$ ).  
188 However, vaccinated status did not significantly reduce the odds of perioperative death in  
189 patients who underwent TEVAR, CEA or supra-inguinal lower extremity intervention. See  
190 Figure 1 for the Forest Plot.

191

192 *Procedure Type:*

193 *AORTIC SURGERY (TABLE II):*

194 Similar to the overall cohort population, unvaccinated patients undergoing OAR, EVAR and  
195 TEVAR were significantly younger than their vaccinated counterparts. Unlike the general  
196 cohort, baseline comorbidities were similar between vaccinated and unvaccinated patients with a  
197 few notable exceptions. Vaccinated patients who underwent TEVAR were more likely to have  
198 preoperative diabetes (19.5% vs 15.3%,  $p = 0.002$ ) and CAD (21.4% vs 18.1%,  $p = 0.02$ )  
199 compared to the unvaccinated cohort. For all patients undergoing aortic surgery, vaccinated  
200 patients were more likely to be on aspirin and statins. In this cohort, unvaccinated patients were  
201 significantly less likely than vaccinated patients to undergo surgery electively. Vaccinated  
202 patients who underwent OAR and EVAR were less likely to have a positive covid diagnosis  
203 (0.9% vs 4.1%,  $p = 0.02$ ; 1.4% vs 3.1%,  $p < 0.001$ ) and perioperative mortality was significantly  
204 lower compared to unvaccinated patients (7.1% vs 10.7%,  $p = 0.02$ ; 3.1% vs 1.4%,  $p < 0.001$ ).  
205 There was no significant difference in covid status or perioperative mortality between  
206 unvaccinated and vaccinated patients who underwent TEVAR.

207

208 *Carotid Artery Revascularization (Table III)*

209 Similar to the overall patient cohort, vaccinated patients undergoing CAS and CEA were more  
210 likely to have a variety of medical comorbidities including hypertension, diabetes, and CHF.  
211 Notably, however, they were less likely than unvaccinated patients to have a history of CVD  
212 (54% vs 59.6%,  $p < 0.001$ ; 48.8% vs 55.2%,  $p < 0.001$ ). Vaccinated patients who underwent  
213 carotid revascularization were more likely to be on an aspirin, statin, ACE-inhibitor, or beta-  
214 blocker. Vaccinated patients who underwent CAS were less likely to have a positive covid  
215 diagnosis (1.0% vs 1.6%,  $p < .001$ ) and peri-operative mortality was significantly reduced  
216 compared to the unvaccinated cohort (0.7% vs 1.3%,  $p < 0.001$ ). There was no significant  
217 difference in covid status or perioperative mortality between unvaccinated and vaccinated  
218 patients who underwent CEA.

219

220 *Peripheral Revascularization (Table IV)*

221 Unlike the overall study population or patients undergoing infra-inguinal bypass, white patients  
222 were over-represented in the unvaccinated cohort who underwent supra-inguinal bypass (82.9%  
223 vs 75.2%,  $p < 0.001$ ). Vaccinated patients who underwent peripheral revascularization were more  
224 likely to have a history of HTN, diabetes, and HD and to be on ACE-inhibitors or beta-blockers.  
225 In patients undergoing supra-inguinal bypass, there was no significant difference in the  
226 likelihood of undergoing an elective procedure between vaccinated and unvaccinated patients.  
227 In patients with underwent either supra- or infrainguinal bypass, there was no significant  
228 difference in the proportion of vaccinated and unvaccinated patients with a positive COVID  
229 diagnosis and there was no significant difference in perioperative mortality.

230 **Discussion**

231 In this retrospective analysis of a large, multicenter database, vaccination against COVID was  
232 significantly associated with reduced perioperative mortality after major vascular surgery.  
233 Despite presenting with a high burden of comorbid conditions, including hypertension, diabetes  
234 and coronary artery disease, vaccinated patients had reduced odds of perioperative mortality after  
235 open AAA, EVAR, CAS, and infra-inguinal lower extremity open revascularization procedures.  
236 Our results underscore the efficacy of the COVID vaccination in reducing perioperative all-cause  
237 mortality, particularly in older, high-risk patients.

238  
239 Recently published reports have examined the protective effect of COVID vaccination amongst a  
240 different subset of surgical patients. In a retrospective, multicenter cohort review of patients  
241 undergoing high risk surgery, Sharath et al found that the unadjusted and adjusted 90-day  
242 mortality rates between vaccinated patients with and without a recent COVID-19 diagnosis were  
243 comparable. Moreover, in a subgroup analysis of matched vaccinated and unvaccinated COVID  
244 positive patients, vaccination reduced 90-day mortality by close to 50%.<sup>15</sup> In a second,  
245 retrospective study of cardiac surgery patients, a cohort with similar risk factors to those  
246 undergoing vascular surgery, Blumenfeld et al examined the effect of perioperative COVID-19  
247 infection on 30-day mortality before and after the development of the COVID vaccine. The  
248 authors reported a significantly elevated risk of perioperative mortality in COVID-19 positive  
249 patients prior to vaccine availability. However, after universal vaccination protocols were put in  
250 place, the association between COVID-19 infection and increased perioperative mortality was no  
251 longer apparent.<sup>16</sup> Although further research is needed, it has been proposed that the reduced

252 mortality may be attributed to effectiveness of the vaccine in quelling the systemic inflammatory  
253 state induced by virus which is further heightened in the context of surgery.<sup>15</sup>

254

255 The reduced all-cause mortality seen in our study population of largely COVID negative patients  
256 cannot be fully explained by the effectiveness of the vaccine in preventing COVID-19-related  
257 deaths. A similar reduction in all-cause mortality was observed in a population-based study out  
258 of Australia, in which the authors proposed several possible explanations for this finding,  
259 including indirect reduction in outcomes associated with COVID-19 infection, such as  
260 cardiovascular and pulmonary complications.<sup>17</sup> Given that vascular surgery patients are amongst  
261 the highest risk patients for postoperative cardiac complications,<sup>18</sup> this hypothesis seems  
262 reasonable. An additional consideration brought forth by the authors was the effect of  
263 confounding, particularly in the form of behavioral differences such as the healthy vaccinee  
264 effect.<sup>17</sup> However, it is worth noting that vaccinated patients within our study tended to present  
265 with more serious comorbid conditions which we believe reduces the likelihood that vaccination  
266 status is a simply a marker for access to and trust in the health care system.

267

268 The higher proportion of older and sicker patients who were vaccinated in our study is consistent  
269 with epidemiologic data within the United States. In the 2021, United States Census Bureau's  
270 Household Pulse Survey of around 61,000 people, unvaccinated people were generally younger  
271 with 75% of the unvaccinated population under the age of 50.<sup>19</sup> This pattern of vaccination can  
272 be at least partially attributed to the way the COVID vaccine was rolled out in most states with  
273 priority given to older adults and those living in group living facilities. However, beyond  
274 logistics, it is conceivable to believe that patients who are aware of serious comorbid conditions

275 may be more likely to vaccinate for specifically that reason, given the widespread knowledge  
276 that people with these risk factors generally had worse outcomes with COVID infections. In fact,  
277 studies have described the relationship between increasing age or pre-existing medical conditions  
278 and the intention to vaccinate.<sup>20-22</sup> The US Census Survey additionally reported a higher  
279 representation of non-Hispanic Black people within the unvaccinated cohort compared to the  
280 vaccinated cohort (13% vs 11%),<sup>19</sup> a finding mirrored within our own study population. The  
281 significance of this disparity cannot be understated, particularly given the disproportionate  
282 impact of both COVID 19 and atherosclerotic cardiovascular disease on black individuals.<sup>23</sup> A  
283 more comprehensive understanding of what drives vaccine hesitancy amongst vascular surgery  
284 patients should be undertaken to better address this issue.

285  
286 During the height of the pandemic, major society guidelines suggested deferring elective  
287 procedures for several weeks after COVID-19 infection.<sup>10</sup> However, in the endemic phase of  
288 COVID-19, as more patients have been exposed to the virus through infection and immunization,  
289 guidelines around surgical timing are in flux. The results of our study, in conjunction with  
290 others,<sup>15,24</sup> suggests a protective effect of vaccination prior to surgery, particularly in patients  
291 whose risk factors predispose them to needing surgical intervention in urgent or emergent  
292 settings, such as those with vascular disease. However, further studies are needed to discern  
293 optimal timing between vaccination and operative intervention to provide greatest protection.

294  
295 There are several limitations to this study, including its retrospective observational nature. While  
296 the use of the VQI-SVS database allowed us to capture a broader population, however, the  
297 registry lacks granular detail. For instance, the extent of vascular disease with regards to anatomy

298 and morphology cannot be fully categorized. Furthermore, while data input is standardized, the  
299 accuracy and completeness of the information is center specific. Certain variables, including the  
300 length of time between vaccination and surgery, choice of vaccination, and implementation of  
301 booster shots were not consistently input into the database, limiting the extent of the analysis we  
302 were able to perform. Furthermore, the VQI does not generate data on the specific cause of  
303 death, so analysis was limited to all-cause mortality. Successful recovery from COVID infection  
304 confers a degree of immunity and it is unclear whether prior infection provides a synergetic,  
305 reductive, or independent effect on vaccination protection against perioperative mortality.  
306 Further longitudinal studies will be needed to elucidate these relationships.

307

#### 308 CONCLUSION:

309 In our analysis of the Vascular Quality Initiative (VQI) database of all patients undergoing major  
310 vascular interventions, we found an association between vaccination status and improved  
311 perioperative survival. This association was most pronounced for patients undergoing AAA  
312 repair, carotid stenting and infrainguinal bypass. As the pandemic enters the endemic stage,  
313 future studies must focus on not only the prevention of viral infection in high-risk surgical  
314 patients, but also on downstream benefits that vaccines may impart on society.

315

316 Acknowledgements: None

317 Funding: None

318 Disclosures: None

319

320

321 **REFERENCES**

- 322 1. Inciardi RM, Solomon SD, Ridker PM, Metra M. Coronavirus 2019 Disease (COVID-19),  
323 Systemic Inflammation, and Cardiovascular Disease. *JAHA*. 2020;9(16):e017756.  
324 doi:10.1161/JAHA.120.017756
- 325 2. Long B, Brady WJ, Koyfman A, Gottlieb M. Cardiovascular complications in COVID-19.  
326 *Am J Emerg Med*. 2020;38(7):1504-1507. doi:10.1016/j.ajem.2020.04.048
- 327 3. Janardhan V, Janardhan V, Kalousek V. COVID-19 as a Blood Clotting Disorder  
328 Masquerading as a Respiratory Illness: A Cerebrovascular Perspective and Therapeutic  
329 Implications for Stroke Thrombectomy. *J Neuroimaging*. 2020;30(5):555-561.  
330 doi:10.1111/jon.12770
- 331 4. Chen YT, Shao SC, Hsu CK, Wu IW, Hung MJ, Chen YC. Incidence of acute kidney injury  
332 in COVID-19 infection: a systematic review and meta-analysis. *Crit Care*. 2020;24(1):346.  
333 doi:10.1186/s13054-020-03009-y
- 334 5. Mao R, Qiu Y, He JS, et al. Manifestations and prognosis of gastrointestinal and liver  
335 involvement in patients with COVID-19: a systematic review and meta-analysis. *Lancet*  
336 *Gastroenterol Hepatol*. 2020;5(7):667-678. doi:10.1016/S2468-1253(20)30126-6
- 337 6. Levi M, Thachil J, Iba T, Levy JH. Coagulation abnormalities and thrombosis in patients  
338 with COVID-19. *Lancet Haematol*. 2020;7(6):e438-e440. doi:10.1016/S2352-  
339 3026(20)30145-9

- 340 7. Middeldorp S, Coppens M, van Haaps TF, et al. Incidence of venous thromboembolism in  
341 hospitalized patients with COVID-19. *J Thromb Haemost.* 2020;18(8):1995-2002.  
342 doi:10.1111/jth.14888
- 343 8. COVIDSurg Collaborative. Mortality and pulmonary complications in patients undergoing  
344 surgery with perioperative SARS-CoV-2 infection: an international cohort study. *Lancet.*  
345 2020;396(10243):27-38. doi:10.1016/S0140-6736(20)31182-X
- 346 9. Doglietto F, Vezzoli M, Gheza F, et al. Factors Associated With Surgical Mortality and  
347 Complications Among Patients With and Without Coronavirus Disease 2019 (COVID-19) in  
348 Italy. *JAMA Surg.* 2020;155(8):691-702. doi:10.1001/jamasurg.2020.2713
- 349 10. Anesthesia Patient Safety Foundation. American Society of Anesthesiologists and  
350 Anesthesia Patient Safety Foundation joint statement on elective surgery and anesthesia for  
351 patients after COVID-19 infection. Accessed January 20, 2024. [https://www.apsf.org/news-](https://www.apsf.org/news-updates/asa-and-apsf-joint-statement-on-elective-surgery-and-anesthesia-for-patients-after-covid-19-infection/)  
352 [updates/asa-and-apsf-joint-statement-on-elective-surgery-and-anesthesia-for-patients-after-](https://www.apsf.org/news-updates/asa-and-apsf-joint-statement-on-elective-surgery-and-anesthesia-for-patients-after-covid-19-infection/)  
353 [covid-19-infection/](https://www.apsf.org/news-updates/asa-and-apsf-joint-statement-on-elective-surgery-and-anesthesia-for-patients-after-covid-19-infection/)
- 354 11. Jagadeesh N, Gnany J, Kapadi S, Koshy N, Shaw D. COVID-19 Vaccination: Does It Alter  
355 Postoperative Mortality and Morbidity in Hip Fractures? *Cureus.* 2022;14(12):e32688.  
356 doi:10.7759/cureus.32688
- 357 12. Prasad NK, Lake R, Englum BR, et al. COVID-19 Vaccination Associated With Reduced  
358 Postoperative SARS-CoV-2 Infection and Morbidity. *Annals of Surgery.* 2022;275(1):31-36.  
359 doi:10.1097/SLA.0000000000005176



- 360 13. Prasad NK, Englum BR, Mayorga-Carlin M, et al. Partial COVID-19 vaccination associated  
361 with reduction in postoperative mortality and SARS-CoV-2 infection. *Am J Surg*.  
362 2022;224(4):1097-1102. doi:10.1016/j.amjsurg.2022.03.038
- 363 14. Mesbah Oskui P, Kloner RA, Burstein S, et al. The safety and efficacy of peripheral vascular  
364 procedures performed in the outpatient setting. *J Invasive Cardiol*. 2015;27(5):243-249.
- 365 15. Sharath SE, Koungias P, Daviú-Molinari T, Faridmoayer E, Berger DH. Association Between  
366 Coronavirus Disease 2019 Vaccination and Mortality After Major Operations. *Annals of*  
367 *Surgery*. 2024;279(1):58-64. doi:10.1097/SLA.0000000000006051
- 368 16. Blumenfeld O, Rosenberg A, Reuven M, Caspi I, Sharoni E, Leviner DB. The effect of  
369 COVID-19 vaccination on 30-day mortality after cardiac surgery – Insights from the Israel  
370 national registries. *Infection Prevention in Practice*. 2024;6(1):100334.  
371 doi:10.1016/j.infpip.2023.100334
- 372 17. Liu B, Stepien S, Dobbins T, et al. Effectiveness of COVID-19 vaccination against COVID-  
373 19 specific and all-cause mortality in older Australians: a population based study. *The Lancet*  
374 *Regional Health - Western Pacific*. 2023;40:100928. doi:10.1016/j.lanwpc.2023.100928
- 375 18. Beaulieu RJ, Sutzko DC, Albright J, Jeruzal E, Osborne NH, Henke PK. Association of High  
376 Mortality With Postoperative Myocardial Infarction After Major Vascular Surgery Despite  
377 Use of Evidence-Based Therapies. *JAMA Surg*. 2020;155(2):131.  
378 doi:10.1001/jamasurg.2019.4908

- 379 19. US Bureau of Census. Household Pulse Survey Data. Published online 2021. Accessed  
380 January 1, 2024. [https://www.census.gov/programs-surveys/household-pulse-](https://www.census.gov/programs-surveys/household-pulse-survey/data.html)  
381 [survey/data.html](https://www.census.gov/programs-surveys/household-pulse-survey/data.html)
- 382 20. Daly M, Robinson E. Willingness to Vaccinate Against COVID-19 in the U.S.:  
383 Representative Longitudinal Evidence From April to October 2020. *American Journal of*  
384 *Preventive Medicine*. 2021;60(6):766-773. doi:10.1016/j.amepre.2021.01.008
- 385 21. Ruiz JB, Bell RA. Predictors of intention to vaccinate against COVID-19: Results of a  
386 nationwide survey. *Vaccine*. 2021;39(7):1080-1086. doi:10.1016/j.vaccine.2021.01.010
- 387 22. Trent M, Seale H, Chughtai AA, Salmon D, MacIntyre CR. Trust in government, intention to  
388 vaccinate and COVID-19 vaccine hesitancy: A comparative survey of five large cities in the  
389 United States, United Kingdom, and Australia. *Vaccine*. 2022;40(17):2498-2505.  
390 doi:10.1016/j.vaccine.2021.06.048
- 391 23. Carnethon MR, Pu J, Howard G, et al. Cardiovascular Health in African Americans: A  
392 Scientific Statement From the American Heart Association. *Circulation*. 2017;136(21).  
393 doi:10.1161/CIR.0000000000000534
- 394 24. Le ST, Kipnis P, Cohn B, Liu VX. COVID-19 Vaccination and the Timing of Surgery  
395 Following COVID-19 Infection. *Annals of Surgery*. 2022;276(5):e265-e272.  
396 doi:10.1097/SLA.00000000000005597
- 397  
398  
399

Table I: Baseline comorbidities and characteristics of unvaccinated and vaccinated patients undergoing major vascular surgery

|                   | Unvaccinated (n = 19161) | Vaccinated (n = 66263) | P Value          |
|-------------------|--------------------------|------------------------|------------------|
| Age (mean +/- SD) | <b>68.44 +/- 10.37</b>   | <b>72.11 +/- 9.20</b>  | <b>&lt;0.001</b> |
| Male              | 12461 (65.0%)            | 43479 (65.6%)          | 0.14             |
| Race              |                          |                        |                  |
| White             | 16191 (84.5%)            | 56359 (85.1%)          | 0.06             |
| Black             | <b>1584 (8.3%)</b>       | <b>5009 (7.6%)</b>     | <b>.001</b>      |
| Current Smoker    | <b>7245 (37.8%)</b>      | <b>16896 (25.5%)</b>   | <b>&lt;0.001</b> |
| Former Smoker     | <b>7260 (37.9%)</b>      | <b>33248 (50.2%)</b>   | <b>&lt;.001</b>  |
| Hypertension      | <b>16700 (87.2%)</b>     | <b>59442 (89.7%)</b>   | <b>&lt;0.001</b> |
| Diabetes          | 6957 (36.3%)             | 24225 (36.5%)          | 0.53             |
| CAD               | 6422 (33.5%)             | 22601 (34.1%)          | 0.13             |
| CABG              | <b>2944 (15.4%)</b>      | <b>11438 (17.3%)</b>   | <b>&lt;0.001</b> |
| PCI               | <b>4217 (22.0%)</b>      | <b>15381 (23.2%)</b>   | <b>0.001</b>     |

|                              |                      |                      |                  |
|------------------------------|----------------------|----------------------|------------------|
| CHF                          | <b>2771 (14.5%)</b>  | <b>10523 (15.9%)</b> | <b>&lt;0.001</b> |
| COPD                         | <b>5423 (35.7%)</b>  | <b>17633 (36.3%)</b> | <b>&lt;0.001</b> |
| Hemodialysis                 | <b>270 (1.4%)</b>    | <b>1129 (1.7%)</b>   | <b>0.005</b>     |
| Preoperative Medications     |                      |                      |                  |
| Aspirin                      | <b>14413 (75.2%)</b> | <b>51610 (77.9%)</b> | <b>&lt;0.001</b> |
| Statin                       | <b>14925 (77.9%)</b> | <b>56021 (84.7%)</b> | <b>&lt;0.001</b> |
| ACE inhibitor                | <b>9546 (49.8%)</b>  | <b>35075 (53.0%)</b> | <b>&lt;0.001</b> |
| P2Y <sub>12</sub> -Inhibitor | <b>9470 (49.4%)</b>  | <b>32123 (48.5%)</b> | <b>0.02</b>      |
| Anticoagulation              | <b>2511 (13.1%)</b>  | <b>9698 (14.6%)</b>  | <b>&lt;0.001</b> |
| Beta Blocker                 | <b>8606 (44.9%)</b>  | <b>33354 (50.4%)</b> | <b>&lt;0.001</b> |
| Elective Status              | <b>14593 (76.2%)</b> | <b>55252 (83.5%)</b> | <b>&lt;0.001</b> |
| Positive COVID Status        | <b>358 (1.9%)</b>    | <b>734 (1.1%)</b>    | <b>&lt;0.001</b> |
| Perioperative Mortality      | <b>360 (1.8%)</b>    | <b>761 (1.1%)</b>    | <b>&lt;0.001</b> |

CAD, coronary artery disease; CABG, coronary artery bypass graft; PCI, percutaneous coronary intervention; CHF, congestive heart failure; COPD, chronic obstructive pulmonary disease; ACE-inhibitor, angiotensin converting enzyme inhibitor

Bold faced p values indicate significance.

Table II: Baseline comorbidities and characteristics of unvaccinated and vaccinated patients undergoing aortic surgery

| Variable          | OPEN                     |                          |                  | EVAR                      |                         |                  | TEVAR                      |                          |                  |
|-------------------|--------------------------|--------------------------|------------------|---------------------------|-------------------------|------------------|----------------------------|--------------------------|------------------|
|                   | Unvaccinated<br>(n= 394) | Vaccinated<br>(n = 1559) | P value          | Unvaccinated<br>(n= 2149) | Vaccinated<br>(n= 8970) | P value          | Unvaccinated<br>(n = 1075) | Vaccinated<br>(n = 3404) | P value          |
| Age (mean +/- SD) | <b>67.29 +/- 9.22</b>    | <b>69.90 +/- 8.38</b>    | <b>&lt;0.001</b> | <b>71.76 +/- 9.08</b>     | <b>74.28 +/- 8.38</b>   | <b>&lt;0.001</b> | <b>65.64 +/- 13.30</b>     | <b>70.91 +/- 11.11</b>   | <b>&lt;0.001</b> |
| Male              | 283 (71.8%)              | 1179 (75.6%)             | 0.14             | 1709 (79.5%)              | 7214 (80.5)             | 0.60             | 711 (66.1%)                | 2250 (66.1)              | 0.73             |
| Race              |                          |                          |                  |                           |                         |                  |                            |                          |                  |
| White             | <b>331 (84.0%)</b>       | <b>1204 (77.3%)</b>      | <b>0.004</b>     | 151 (7.0%)                | 563 (6.3%)              | .20              | <b>674 (62.7%)</b>         | <b>2360 (69.4%)</b>      | <b>&lt;0.001</b> |
| Black             | 22 (5.6%)                | 78 (5.0%)                | 0.64             | 1801 (83.9%)              | 7539 (84.1%)            | .85              | <b>242 (22.5%)</b>         | <b>535 (15.7%)</b>       | <b>&lt;0.001</b> |
| Current Smoker    | <b>147 (37.4%)</b>       | <b>757 (48.7%)</b>       | <b>&lt;0.001</b> | <b>939 (43.8%)</b>        | <b>2673 (29.8%)</b>     | <b>&lt;0.001</b> | <b>432 (40.3%)</b>         | <b>978 (28.8%)</b>       | <b>&lt;0.001</b> |
| Former Smoker     | <b>204 (51.9%)</b>       | <b>630 (40.5%)</b>       | <b>&lt;0.001</b> | <b>909 (42.4%)</b>        | <b>4985 (55.6%)</b>     | <b>&lt;0.001</b> | <b>380 (35.4%)</b>         | <b>1664 (48.9%)</b>      | <b>&lt;0.001</b> |

|                   |                    |                     |                  |                     |                     |                  |                    |                     |                  |
|-------------------|--------------------|---------------------|------------------|---------------------|---------------------|------------------|--------------------|---------------------|------------------|
| Hypertension      | 318 (80.7%)        | 1305 (83.8%)        | 0.16             | <b>1794 (83.5%)</b> | <b>7698 (85.9%)</b> | <b>0.005</b>     | 979 (91.2%)        | 3099<br>(91.1%)     | 0.98             |
| Diabetes          | 64 (16.2%)         | 271 (17.4%)         | 0.64             | 442 (20.6%)         | 1924 (21.5%)        | 0.38             | <b>164 (15.3%)</b> | <b>665 (19.5%)</b>  | <b>0.002</b>     |
| CAD               | 82 (20.8%)         | 348 (22.4%)         | 0.54             | 574 (26.7%)         | 2509 (28.0%)        | 0.24             | <b>195 (18.1%)</b> | <b>727 (21.4%)</b>  | <b>0.02</b>      |
| Prior CABG        | 43 (10.9%)         | 174 (11.2%)         | 0.95             | 297 (13.8%)         | 1328 (14.8%)        | 0.26             | <b>93 (8.7%)</b>   | <b>400 (11.8%)</b>  | <b>0.006</b>     |
| Prior PCI         | 67 (17.0%)         | 290 (18.6%)         | 0.50             | 478 (22.3%)         | 2048 (22.9%)        | 0.59             | <b>147 (13.7%)</b> | <b>576 (16.9%)</b>  | <b>0.01</b>      |
| CHF               | 33 (8.4%)          | 156 (10.0%)         | 0.37             | 304 (14.2%)         | 1319 (14.7%)        | 0.53             | 190 (17.7%)        | 574 (16.9%)         | 0.57             |
| COPD              | 128 (32.5%)        | 524 (33.7%)         | 0.71             | 747 (34.8%)         | 3096 (34.5%)        | 0.86             | 352 (32.7%)        | 1157<br>(34.0%)     | 0.47             |
| Hemodialysis      | 2 (0.5%)           | 8 (0.5%)            | 1.00             | 27 (1.3%)           | 96 (1.1%)           | 0.53             | 30 (2.8%)          | 91 (2.7%)           | 0.92             |
| Preop Medications |                    |                     |                  |                     |                     |                  |                    |                     |                  |
| Aspirin           | <b>207 (52.7%)</b> | <b>923 (59.4%)</b>  | <b>0.02</b>      | <b>1207 (56.2%)</b> | <b>5255 (58.7%)</b> | <b>0.04</b>      | <b>575 (53.5%)</b> | <b>2015 (59.3%)</b> | <b>0.001</b>     |
| Statins           | <b>242 (61.6%)</b> | <b>1193 (76.7%)</b> | <b>&lt;0.001</b> | <b>1415 (65.9%)</b> | <b>6822 (76.2%)</b> | <b>&lt;0.001</b> | <b>618 (57.5%)</b> | <b>2416</b>         | <b>&lt;0.001</b> |

|                              |                    |                     |                  |                     |                     |                  |                    |                     |                  |
|------------------------------|--------------------|---------------------|------------------|---------------------|---------------------|------------------|--------------------|---------------------|------------------|
|                              |                    |                     |                  |                     |                     |                  |                    | <b>(71.1%)</b>      |                  |
| ACE-inhibitor                | <b>152 (38.7%)</b> | <b>738 (47.4%)</b>  | <b>0.002</b>     | <b>975 (45.4%)</b>  | <b>4310 (48.1%)</b> | <b>0.02</b>      | 488 (45.4%)        | 1561 (45.9%)        | 0.82             |
| P2Y <sub>12</sub> inhibitors | 32 (8.1%)          | 126 (8.1%)          | 1.00             | <b>333 (15.5%)</b>  | <b>1195 (13.3%)</b> | <b>0.01</b>      | 144 (13.4%)        | 406 (11.9%)         | 0.22             |
| Anticoagulation              | 37 (9.4%)          | 206 (13.2%)         | 0.05             | <b>337 (15.7%)</b>  | <b>1572 (17.5%)</b> | <b>0.04</b>      | <b>163 (15.2%)</b> | <b>630 (18.5%)</b>  | <b>0.01</b>      |
| Beta-blocker                 | <b>168 (42.9%)</b> | <b>760 (48.8%)</b>  | <b>0.04</b>      | <b>1004 (46.8%)</b> | <b>4555 (50.8%)</b> | <b>0.001</b>     | 730 (67.9%)        | 2248 (66.0%)        | 0.27             |
| Elective                     | <b>281 (71.3%)</b> | <b>1210 (77.6%)</b> | <b>0.01</b>      | <b>1631 (76.2%)</b> | <b>7787 (86.9%)</b> | <b>&lt;0.001</b> | <b>706 (65.7%)</b> | <b>2694 (79.2%)</b> | <b>&lt;0.001</b> |
| Positive COVID Status        | <b>16 (4.1%)</b>   | <b>14 (0.9%)</b>    | <b>&lt;0.001</b> | <b>41 (1.9%)</b>    | <b>103 (1.2%)</b>   | <b>0.005</b>     | 26 (2.4%)          | 58 (1.7%)           | 0.13             |
| Mortality                    | <b>42 (10.7%)</b>  | <b>111 (7.1%)</b>   | <b>0.02</b>      | <b>67 (3.1%)</b>    | <b>127 (1.4%)</b>   | <b>&lt;0.001</b> | 57 (5.3%)          | 141 (4.2%)          | 0.11             |

CAD, coronary artery disease; CABG, coronary artery bypass graft; PCI, percutaneous coronary intervention; CHF, congestive heart failure; COPD, chronic obstructive pulmonary disease; ACE-inhibitor, angiotensin converting enzyme inhibitor

**Bold faced p values indicate significance.**



Table III: Baseline comorbidities and characteristics of unvaccinated and vaccinated patients undergoing carotid artery revascularization

| Variable          | CAS                        |                            |                  | CEA                        |                           |                  |
|-------------------|----------------------------|----------------------------|------------------|----------------------------|---------------------------|------------------|
|                   | Unvaccinated<br>(n = 6933) | Vaccinated.<br>(n = 22308) | P value          | Unvaccinated<br>(n = 5790) | Vaccinated<br>(n = 20506) | P Value          |
| Age (mean +/- SD) | <b>69.83 +/-<br/>10.18</b> | <b>73.16 +/- 8.98</b>      | <b>&lt;0.001</b> | <b>69.07 +/- 9.53</b>      | <b>72.02 +/- 8.61</b>     | <b>&lt;0.001</b> |
| Male              | 4306 (62.1%)               | 14008 (62.8%)              | 0.30             | 3509 (60.6%)               | 12288 (59.9%)             | 0.58             |
| Race              |                            |                            |                  |                            |                           |                  |
| White             | <b>6075 (87.7%)</b>        | <b>19881 (89.1%)</b>       | <b>0.001</b>     | 5157 (89.1%)               | 18331 (89.5%)             | 0.42             |
| Black             | <b>442 (6.4%)</b>          | <b>1270 (5.7%)</b>         | <b>0.04</b>      | 280 (4.8%)                 | 1065 (5.2%)               | 0.27             |
| Current Smoker    | <b>2245 (32.5%)</b>        | <b>4481 (20.1%)</b>        | <b>&lt;0.001</b> | <b>1915 (33.1%)</b>        | <b>4515 (22.0%)</b>       | <b>&lt;0.001</b> |
| Former Smoker     | <b>2660 (38.5%)</b>        | <b>11152 (50.0%)</b>       | <b>&lt;0.001</b> | <b>2265 (39.1%)</b>        | <b>10194 (49.7%)</b>      | <b>&lt;0.001</b> |
| Hypertension      | <b>6089 (87.9%)</b>        | <b>20235 (90.7%)</b>       | <b>&lt;0.001</b> | <b>5161 (89.1%)</b>        | <b>18604 (90.8%)</b>      | <b>&lt;0.001</b> |
| Diabetes          | <b>2585 (37.3%)</b>        | <b>8826 (39.6%)</b>        | <b>0.001</b>     | <b>2110 (36.4%)</b>        | <b>7911 (38.6%)</b>       | <b>&lt;0.001</b> |
| CAD               | <b>3141 (45.3%)</b>        | <b>10805 (48.5%)</b>       | <b>&lt;0.001</b> | 1618 (27.9%)               | 5527 (27.0%)              | 0.15             |

|                              |                     |                      |                  |                     |                      |                  |
|------------------------------|---------------------|----------------------|------------------|---------------------|----------------------|------------------|
| Prior CABG                   | <b>1126 (16.3%)</b> | <b>4233 (19.0%)</b>  | <b>&lt;0.001</b> | 958 (16.6%)         | 3604 (17.6%)         | 0.07             |
| Prior PCI                    | <b>1659 (24.0%)</b> | <b>5826 (26.2%)</b>  | <b>&lt;0.001</b> | 1239 (21.4%)        | 4506 (22.0%)         | 0.35             |
| CHF                          | <b>1038 (15.0%)</b> | <b>3759 (16.9%)</b>  | <b>&lt;0.001</b> | <b>710 (12.3%)</b>  | <b>2781 (13.6%)</b>  | <b>0.01</b>      |
| COPD                         | 1636 (23.6%)        | 5282 (23.7%)         | 0.89             | 1343 (23.2%)        | 4696 (22.9%)         | 0.66             |
| CVD                          | <b>4127 (59.6%)</b> | <b>12031 (54.0%)</b> | <b>&lt;0.001</b> | <b>3196 (55.2%)</b> | <b>9997 (48.8%)</b>  | <b>&lt;0.001</b> |
| Hemodialysis                 | 89 (1.3%)           | 286 (1.3%)           | 1.00             | 48 (0.8%)           | 217 (1.1%)           | 0.14             |
| Preoperative Medications     |                     |                      |                  |                     |                      |                  |
| Aspirin                      | <b>5745 (82.9%)</b> | <b>19499 (87.5%)</b> | <b>&lt;0.001</b> | <b>4707 (81.4%)</b> | <b>17086(83.4%)</b>  | <b>&lt;0.001</b> |
| Statin                       | <b>5721 (82.6%)</b> | <b>19679 (88.3%)</b> | <b>&lt;0.001</b> | <b>4757 (82.2%)</b> | <b>18066(88.2%)</b>  | <b>&lt;0.001</b> |
| ACE-inhibitor                | <b>3483 (50.3%)</b> | <b>12064 (54.1%)</b> | <b>&lt;0.001</b> | <b>3057 (52.8%)</b> | <b>11287 (55.1%)</b> | <b>0.002</b>     |
| P2Y <sub>12</sub> -inhibitor | <b>5522 (79.7%)</b> | <b>19057 (85.5%)</b> | <b>&lt;0.001</b> | <b>2459 (42.5%)</b> | <b>8320 (40.6%)</b>  | <b>0.01</b>      |
| Anticoagulation              | <b>409 (6.4%)</b>   | <b>1463 (7.3%)</b>   | <b>0.02</b>      | <b>784 (13.5%)</b>  | <b>3091 (15.1%)</b>  | <b>0.004</b>     |
| Beta-blocker                 | <b>3085 (44.5%)</b> | <b>11207 (50.3%)</b> | <b>&lt;0.001</b> | <b>2448 (42.3%)</b> | <b>9815 (47.9%)</b>  | <b>&lt;0.001</b> |
| Elective                     | <b>5201 (75.1%)</b> | <b>18367 (82.5%)</b> | <b>&lt;0.001</b> | <b>4696 (81.1%)</b> | <b>17845 (87.0%)</b> | <b>&lt;0.001</b> |
| Positive COVID               | <b>114 (1.6%)</b>   | <b>216 (1.0%)</b>    | <b>&lt;.001</b>  | 110 (1.2%)          | 208 (1.0%)           | .20              |

|           |                  |                   |                 |           |           |     |
|-----------|------------------|-------------------|-----------------|-----------|-----------|-----|
| Status    |                  |                   |                 |           |           |     |
| Mortality | <b>88 (1.3%)</b> | <b>157 (0.7%)</b> | <b>&lt;.001</b> | 22 (0.4%) | 62 (0.3%) | .36 |

CAD, coronary artery disease; CABG, coronary artery bypass graft; PCI, percutaneous coronary intervention; CHF, congestive heart failure; CVD, cerebrovascular disease; ACE-inhibitor, angiotensin converting enzyme inhibitor

Bold faced p values indicate significance.

Table IV: Baseline comorbidities and characteristics of unvaccinated and vaccinated patients undergoing revascularization for peripheral artery disease.

|                   | SUPRAINGUINAL             |                          |                  | INFRAINGUINAL              |                          |                  |
|-------------------|---------------------------|--------------------------|------------------|----------------------------|--------------------------|------------------|
|                   | Unvaccinated<br>(N = 620) | Vaccinated<br>(N = 1635) | P Value          | Unvaccinated<br>(n = 2200) | Vaccinated<br>(n = 7881) | P Value          |
| Age (mean +/- SD) | <b>62.15 +/- 9.866</b>    | <b>66.81 +/- 9.682</b>   | <b>&lt;0.001</b> | <b>64.90 +/-10.412</b>     | <b>68.87 +/- 9.928</b>   | <b>&lt;0.001</b> |
| Male              | 383 (61.8%)               | 957 (58.5%)              | 0.32             | 1560 (70.9%)               | 5584 (70.9%)             | 0.87             |
| Race              |                           |                          |                  |                            |                          | 0.10             |
| White             | <b>513 (82.9%)</b>        | <b>1228 (75.2%)</b>      | <b>&lt;0.001</b> | 1640 (74.5%)               | 5816 (73.8%)             | 0.51             |
| Black             | 65 (10.5%)                | 190 (11.6%)              | 0.45             | 382 (17.4%)                | 1308 (16.6%)             | 0.40             |
| Current Smoker    | <b>407 (65.6%)</b>        | <b>816 (49.9%)</b>       | <b>&lt;0.001</b> | <b>1160 (52.8%)</b>        | <b>2804 (35.6%)</b>      | <b>&lt;0.001</b> |
| Former Smoker     | <b>192 (31.0%)</b>        | <b>745 (45.6%)</b>       | <b>&lt;0.001</b> | <b>710 (32.3%)</b>         | <b>3751 (47.6%)</b>      | <b>&lt;0.001</b> |
| Hypertension      | <b>502 (81.1%)</b>        | <b>1393 (85.3%)</b>      | <b>0.02</b>      | <b>1857 (84.5%)</b>        | <b>7108 (90.2%)</b>      | <b>&lt;0.001</b> |
| Diabetes          | <b>164 (26.5%)</b>        | <b>526 (32.2%)</b>       | <b>0.01</b>      | <b>1068 (48.6%)</b>        | <b>4102 (52.1%)</b>      | <b>0.01</b>      |
| CAD               | 158 (25.5%)               | 402 (24.7%)              | 0.68             | 654 (31.3%)                | 2283 (30.5%)             | 0.49             |
| Prior CABG        | <b>56 (9.0%)</b>          | <b>209 (12.8%)</b>       | <b>0.01</b>      | <b>371 (16.9%)</b>         | <b>1490 (18.9%)</b>      | <b>0.03</b>      |

|                              |                    |                    |             |                     |                     |                  |
|------------------------------|--------------------|--------------------|-------------|---------------------|---------------------|------------------|
| Prior PCI                    | 109 (17.6%)        | 285 (17.4%)        | 0.94        | 518 (23.6%)         | 1850 (23.5%)        | 0.94             |
| CHF                          | 67 (10.8%)         | 219 (13.4%)        | 0.10        | <b>429 (19.5%)</b>  | <b>1715 (21.8%)</b> | <b>0.02</b>      |
| COPD                         | <b>208 (33.5%)</b> | <b>644 (39.4%)</b> | <b>0.01</b> | 619 (28.2%)         | 2234 (28.4%)        | 0.87             |
| Hemodialysis                 | <b>5 (0.8%)</b>    | <b>38 (2.3%)</b>   | <b>0.02</b> | <b>69 (3.1%)</b>    | <b>393 (5.0%)</b>   | <b>&lt;0.001</b> |
| Preoperative Medications     |                    |                    |             |                     |                     |                  |
| Aspirin                      | 445 (71.9%)        | 1177 (72.0%)       | 0.96        | <b>1527 (69.4%)</b> | <b>5655 (71.8%)</b> | <b>0.03</b>      |
| Statin                       | 485 (78.4%)        | 1319 (80.7%)       | 0.22        | <b>1687 (76.8%)</b> | <b>6526 (82.9%)</b> | <b>&lt;0.001</b> |
| ACE-inhibitor                | <b>279 (45.1%)</b> | <b>831 (50.8%)</b> | <b>0.02</b> | <b>1112 (50.6%)</b> | <b>4284 (54.4%)</b> | <b>0.002</b>     |
| P2Y <sub>12</sub> -inhibitor | 154 (24.9%)        | 354 (21.7%)        | 0.10        | <b>826 (37.6%)</b>  | <b>2665 (33.8%)</b> | <b>0.001</b>     |
| AC                           | 140 (22.6%)        | 343 (22.0%)        | 0.40        | 641 (29.1%)         | 2393 (30.4%)        | 0.27             |
| Beta-blocker                 | <b>222 (35.9%)</b> | <b>687 (42.0%)</b> | <b>0.01</b> | <b>949 (43.2%)</b>  | <b>4082 (51.8%)</b> | <b>&lt;0.001</b> |
| Elective                     | 461 (74.5%)        | 1259 (77.1%)       | 0.20        | <b>1617 (73.6%)</b> | <b>6090 (77.3%)</b> | <b>&lt;0.001</b> |
| Positive COVID Status        | 10 (1.6%)          | 21 (1.3%)          | 0.55        | 41 (1.9%)           | 114 (1.4%)          | 0.16             |
| Mortality                    | 25 (4.0%)          | 59 (3.6%)          | 0.64        | 34 (1.5%)           | 104 (1.3%)          | 0.42             |

CAD, coronary artery disease; CABG, coronary artery bypass graft; PCI, percutaneous coronary intervention; CHF, congestive heart failure; CVD, cerebrovascular disease; ACE-inhibitor, angiotensin converting enzyme inhibitor

**Bold faced p values indicate significance.**

Figure 1: Forest Plot Evaluating COVID Vaccination Status and Mortality

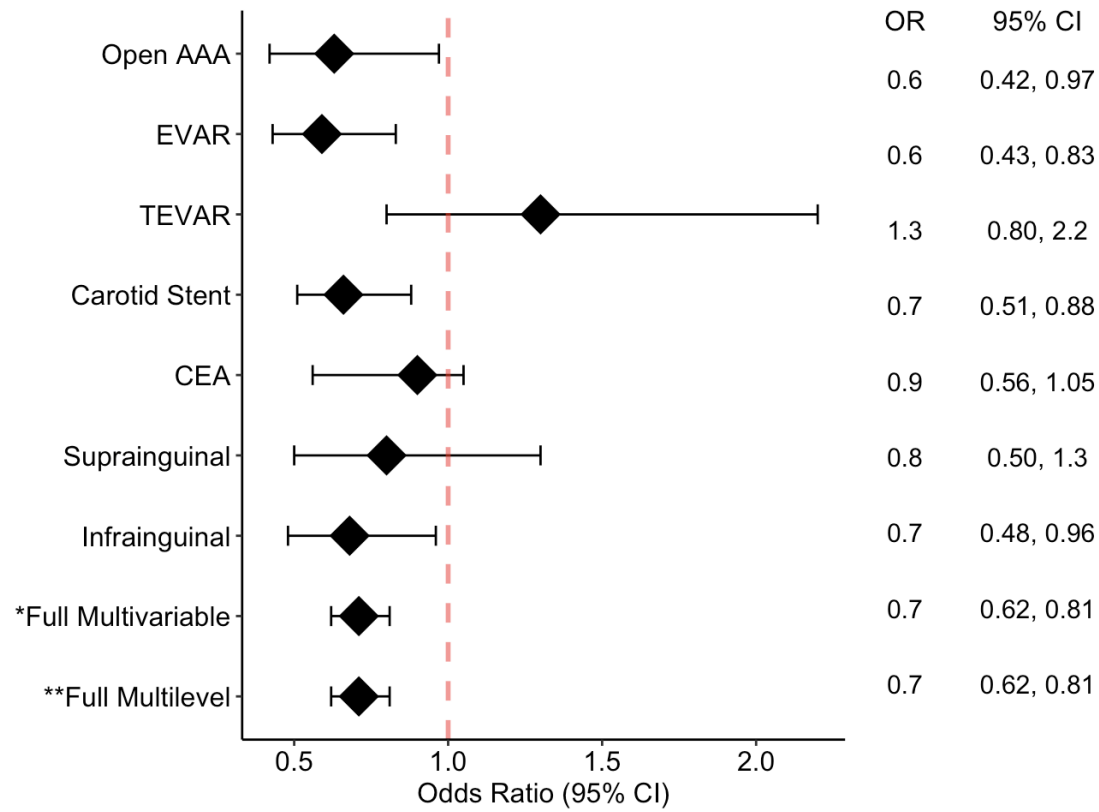

Source: https://medrxiv.org/content/medrxiv/early/2024/03/13/2024.03.11.24304133.full.pdf
